# Supplementary material for: Relative Validity and Reproducibility of a Food Frequency Questionnaire to Assess Energy Intake from Minimally Processed and Ultra-Processed Foods in Young Children
Source: PubMed Central journal article supplement (PMC6627316; doi:10.3390/nu11061290), 2019-06-07

# 5 year Food Frequency Questionnaire

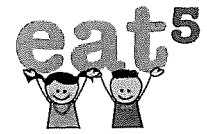

To be administered to the child's main carer

EAT5 study number 

|  |  |  |  |
|--|--|--|--|
|  |  |  |  |
|--|--|--|--|

Interview date 

|    |    |    |
|----|----|----|
| DD | MM | YY |
|----|----|----|

Interviewer name \_\_\_\_\_

## You will need:

- This questionnaire
- Ready reckoners 1 and 2
- Plate
- Bowl
- Mug
- Glass
- Measuring cup
- Measuring spoons
- Funnel
- Beans
- Rice

1

## Instructions for the interviewer:

- Please check that the POI study number, the date, and your name are **recorded on the front page** before starting the questionnaire
- Ask each question in turn **as it is worded** in the questionnaire.
- Each food should be **entered only once** and as **separate items** where possible. For example, if they had custard and peaches for pudding, this should be entered as i) custard and ii) peaches – not as "puddings not yet described".
- **Mixed dishes should be entered separately** – so lasagne should be entered as appropriate amounts of "Other pasta (pasta only - not including sauce)", "Mince & patties (from beef or lamb)", and "White or cheese sauce", and "Cooked tomato (pasta sauce, canned tomatoes etc)".
- Room has been left at the bottom of each page to **make comments** that will help with interpreting the data – we would like you to put as much information as possible. For instance a child might have a slice of bread that is from a breadmaker which is much thicker than the standard toaster slice.

## Choosing a frequency

- Enter **only one value for frequency** (that is, how often a week OR day, not both)
- Make sure there is a frequency for **every food** (i.e., use the "not eaten this month" column as appropriate)
- Use "Ready Reckoner 1" if parent says that the child has something **regularly but only for part of the week**, for example, "Beth has a banana twice a day during the week but not at all in the weekend". This will give you the single frequency option to use.
- Use "Ready Reckoner 2" for those **questions that include more than one food**, for example "white buns (not iced), crumpets". This will give you the single frequency option to use.

## Estimating the amount eaten

- For those foods that have a "standard" unit provided, the parent needs to estimate how many of these units (or fractions of units such as ¼ or ½) the child would usually eat (1st example on the next page).
- For those foods with units of **ml**, you need to use the beans (larger foods) or rice (smaller foods) to estimate the volume they consume. Ask the parent to pour the beans or rice into the plate or cup (whichever is appropriate) to the level that their child would usually eat. You then pour this amount into the measuring cup and record the volume (2nd example on the next page).

2

| Example | Food                       | How often have they eaten this food this month?<br><i>Complete one frequency column only per food</i> |                       |             |                |                |                |                |                |           |                                                | How much did they eat each time? |                                            |   |
|---------|----------------------------|-------------------------------------------------------------------------------------------------------|-----------------------|-------------|----------------|----------------|----------------|----------------|----------------|-----------|------------------------------------------------|----------------------------------|--------------------------------------------|---|
|         |                            | Not eaten this month                                                                                  | Less than once a week | Once a week | 2 times a week | 3 times a week | 4 times a week | 5 times a week | 6 times a week | Every day | If more than once a day – how many times a day | Units                            | How many [units] would they eat each time? |   |
| 1       | Instant noodles            |                                                                                                       |                       | ✓           |                |                |                |                |                |           |                                                |                                  | 1 packet                                   | ¾ |
| 2       | Cornflakes or rice bubbles |                                                                                                       |                       |             |                |                |                |                | ✓              |           |                                                |                                  | 140 ml                                     |   |

### Instructions for the participant:

- These questions ask how often and how much *child's name* has eaten certain foods or beverages **over the past month**.
- *Child's name* may sometimes be fed by a relative, friend, or someone else. If you know the type of food and approximate amount s/he has eaten at these times please include them.
- Please tell us what they **actually** ate and drank; we are interested in what children actually eat, not the perfect diet.
- All information is stored by study number and not by your name.

3

### A. Bread, crackers and breakfast cereals

|   | Food                                 | How often have they eaten this food this month?<br><i>Complete one frequency column only per food</i> |                       |             |                |                |                |                |                |           |                                                | How much did they eat each time? |                                            |  |
|---|--------------------------------------|-------------------------------------------------------------------------------------------------------|-----------------------|-------------|----------------|----------------|----------------|----------------|----------------|-----------|------------------------------------------------|----------------------------------|--------------------------------------------|--|
|   |                                      | Not eaten this month                                                                                  | Less than once a week | Once a week | 2 times a week | 3 times a week | 4 times a week | 5 times a week | 6 times a week | Every day | If more than once a day – how many times a day | Units                            | How many [units] would they eat each time? |  |
| 1 | White bread                          |                                                                                                       |                       |             |                |                |                |                |                |           |                                                |                                  | 1 toaster slice                            |  |
| 2 | White buns (not iced), crumpets      |                                                                                                       |                       |             |                |                |                |                |                |           |                                                |                                  | 1 small bun or 1 crumpet                   |  |
| 3 | Wholemeal bread or bun               |                                                                                                       |                       |             |                |                |                |                |                |           |                                                |                                  | 1 toaster slice or 1 small bun             |  |
| 4 | Wholegrain bread or bun              |                                                                                                       |                       |             |                |                |                |                |                |           |                                                |                                  | 1 toaster slice or 1 small bun             |  |
| 5 | Crackers (wheat, rice or corn-based) |                                                                                                       |                       |             |                |                |                |                |                |           |                                                |                                  | 1 cracker                                  |  |
| 6 | Rice cakes or rice wheels*           |                                                                                                       |                       |             |                |                |                |                |                |           |                                                |                                  | 1 rice cake or 17 rice wheels              |  |
| 7 | Cruskits or crispbreads              |                                                                                                       |                       |             |                |                |                |                |                |           |                                                |                                  | 1 cruskit                                  |  |

Comments?

\* Rice wheel = tiny kids' size rice cake (~ 50 cent coin in diameter)

\* Rice cake = puffed rice crackers the size of a large cookie

|    | Food                                                                | How often have they eaten this food this month?<br><i>Complete one frequency column only per food</i> |                       |             |                |                |                |                |                |           |                                                | How much did they eat each time? |                                            |  |
|----|---------------------------------------------------------------------|-------------------------------------------------------------------------------------------------------|-----------------------|-------------|----------------|----------------|----------------|----------------|----------------|-----------|------------------------------------------------|----------------------------------|--------------------------------------------|--|
|    |                                                                     | Not eaten this month                                                                                  | Less than once a week | Once a week | 2 times a week | 3 times a week | 4 times a week | 5 times a week | 6 times a week | Every day | If more than once a day – how many times a day | Units                            | How many [units] would they eat each time? |  |
| 8  | Weet-bix                                                            |                                                                                                       |                       |             |                |                |                |                |                |           |                                                |                                  | 1 weetbix                                  |  |
| 9  | Fruity-bix or similar                                               |                                                                                                       |                       |             |                |                |                |                |                |           |                                                |                                  | _____ ml                                   |  |
| 10 | Porridge                                                            |                                                                                                       |                       |             |                |                |                |                |                |           |                                                |                                  | _____ ml                                   |  |
| 11 | Cornflakes or rice bubbles                                          |                                                                                                       |                       |             |                |                |                |                |                |           |                                                |                                  | _____ ml                                   |  |
| 12 | Cocopops, honey puffs or puffed wheat cereal                        |                                                                                                       |                       |             |                |                |                |                |                |           |                                                |                                  | _____ ml                                   |  |
| 13 | Nutrigrain, Milo cereal or similar                                  |                                                                                                       |                       |             |                |                |                |                |                |           |                                                |                                  | _____ ml                                   |  |
| 14 | Muesli and "light" muesli (e.g. "Light and Tasty, Light and Right") |                                                                                                       |                       |             |                |                |                |                |                |           |                                                |                                  | _____ ml                                   |  |
| 15 | Other breakfast cereal (record name of main one): _____             |                                                                                                       |                       |             |                |                |                |                |                |           |                                                |                                  | _____ ml                                   |  |

Comments?

## B. Rice and pasta

|    | Food                                           | How often have they eaten this food this month?<br><i>Complete one frequency column only per food</i> |                       |             |                |                |                |                |                |           |                                                | How much did they eat each time? |                                            |  |
|----|------------------------------------------------|-------------------------------------------------------------------------------------------------------|-----------------------|-------------|----------------|----------------|----------------|----------------|----------------|-----------|------------------------------------------------|----------------------------------|--------------------------------------------|--|
|    |                                                | Not eaten this month                                                                                  | Less than once a week | Once a week | 2 times a week | 3 times a week | 4 times a week | 5 times a week | 6 times a week | Every day | If more than once a day – how many times a day | Units                            | How many [units] would they eat each time? |  |
| 16 | White rice                                     |                                                                                                       |                       |             |                |                |                |                |                |           |                                                |                                  | _____ ml                                   |  |
| 17 | Brown rice                                     |                                                                                                       |                       |             |                |                |                |                |                |           |                                                |                                  | _____ ml                                   |  |
| 18 | Instant noodles                                |                                                                                                       |                       |             |                |                |                |                |                |           |                                                |                                  | 1 packet                                   |  |
| 19 | Canned spaghetti                               |                                                                                                       |                       |             |                |                |                |                |                |           |                                                |                                  | 1 medium can (420g)                        |  |
| 20 | Other pasta (pasta only - not including sauce) |                                                                                                       |                       |             |                |                |                |                |                |           |                                                |                                  | _____ ml                                   |  |
| 21 | Pizza (not takeaway) – base only               |                                                                                                       |                       |             |                |                |                |                |                |           |                                                |                                  | 1 slice                                    |  |

Comments?

### C. Fruit

22 How often has your child had fruit in the past month?

\_\_\_\_\_ less than once a week OR \_\_\_\_\_ times a week OR \_\_\_\_\_ times a day

|    | Food                                         | How often have they eaten this food this month?<br><i>Complete one frequency column only per food</i> |                       |             |                |                |                |                |                |           |                                                | How much did they eat each time? |                                            |  |
|----|----------------------------------------------|-------------------------------------------------------------------------------------------------------|-----------------------|-------------|----------------|----------------|----------------|----------------|----------------|-----------|------------------------------------------------|----------------------------------|--------------------------------------------|--|
|    |                                              | Not eaten this month                                                                                  | Less than once a week | Once a week | 2 times a week | 3 times a week | 4 times a week | 5 times a week | 6 times a week | Every day | If more than once a day – how many times a day | Units                            | How many [units] would they eat each time? |  |
| 23 | Banana                                       |                                                                                                       |                       |             |                |                |                |                |                |           |                                                |                                  | 1 banana*                                  |  |
| 24 | Apples (fresh or canned)                     |                                                                                                       |                       |             |                |                |                |                |                |           |                                                |                                  | 1 apple                                    |  |
| 25 | Apricots, plums or peaches (fresh or canned) |                                                                                                       |                       |             |                |                |                |                |                |           |                                                |                                  | 1 apricot or 1 plum, or ½ peach            |  |
| 26 | Pears (fresh or canned)                      |                                                                                                       |                       |             |                |                |                |                |                |           |                                                |                                  | 1 pear                                     |  |
| 27 | Raisins or sultanas                          |                                                                                                       |                       |             |                |                |                |                |                |           |                                                |                                  | 1 small box (12g)                          |  |
| 28 | Dried apricots or prunes                     |                                                                                                       |                       |             |                |                |                |                |                |           |                                                |                                  | 1 prune                                    |  |
| 29 | Oranges, mandarins                           |                                                                                                       |                       |             |                |                |                |                |                |           |                                                |                                  | 1 orange or 2 mandarins                    |  |

Comments?

\*2 bobby bananas = 1 medium banana

7

|    | Food                                  | How often have they eaten this food this month?<br><i>Complete one frequency column only per food</i> |                       |             |                |                |                |                |                |           |                                                | How much did they eat each time? |                                            |  |
|----|---------------------------------------|-------------------------------------------------------------------------------------------------------|-----------------------|-------------|----------------|----------------|----------------|----------------|----------------|-----------|------------------------------------------------|----------------------------------|--------------------------------------------|--|
|    |                                       | Not eaten this month                                                                                  | Less than once a week | Once a week | 2 times a week | 3 times a week | 4 times a week | 5 times a week | 6 times a week | Every day | If more than once a day – how many times a day | Units                            | How many [units] would they eat each time? |  |
| 30 | Kiwifruit                             |                                                                                                       |                       |             |                |                |                |                |                |           |                                                |                                  | 1 kiwifruit                                |  |
| 31 | Green grapes                          |                                                                                                       |                       |             |                |                |                |                |                |           |                                                |                                  | 1 grape                                    |  |
| 32 | Black or red grapes                   |                                                                                                       |                       |             |                |                |                |                |                |           |                                                |                                  | 1 grape                                    |  |
| 33 | Berries or cherries (fresh or frozen) |                                                                                                       |                       |             |                |                |                |                |                |           |                                                |                                  | _____ ml                                   |  |
| 34 | Avocado                               |                                                                                                       |                       |             |                |                |                |                |                |           |                                                |                                  | 1 avocado                                  |  |
| 35 | Rhubarb                               |                                                                                                       |                       |             |                |                |                |                |                |           |                                                |                                  | _____ ml                                   |  |
| 36 | Other fruit                           |                                                                                                       |                       |             |                |                |                |                |                |           |                                                |                                  | _____ ml                                   |  |

Comments?

## D. Vegetables

37 How often has your child had vegetables in the past month?

\_\_\_\_\_ less than once a week OR \_\_\_\_\_ times a week OR \_\_\_\_\_ times a day

|    | Food                                                                              | How often have they eaten this food this month?<br><i>Complete one frequency column only per food</i> |                       |             |                |                |                |                |                |           |                                                | How much did they eat each time? |                                            |  |
|----|-----------------------------------------------------------------------------------|-------------------------------------------------------------------------------------------------------|-----------------------|-------------|----------------|----------------|----------------|----------------|----------------|-----------|------------------------------------------------|----------------------------------|--------------------------------------------|--|
|    |                                                                                   | Not eaten this month                                                                                  | Less than once a week | Once a week | 2 times a week | 3 times a week | 4 times a week | 5 times a week | 6 times a week | Every day | If more than once a day – how many times a day | Units                            | How many [units] would they eat each time? |  |
| 38 | Potato salad or other potato eaten cold                                           |                                                                                                       |                       |             |                |                |                |                |                |           |                                                |                                  | _____ ml                                   |  |
| 39 | Potato or kumara (boiled, baked, microwaved, mashed) eaten warm or hot            |                                                                                                       |                       |             |                |                |                |                |                |           |                                                |                                  | _____ ml                                   |  |
| 40 | Hot chips, potato shapes, roast potato or kumara cooked at home eaten warm or hot |                                                                                                       |                       |             |                |                |                |                |                |           |                                                |                                  | _____ ml                                   |  |
| 41 | Yams                                                                              |                                                                                                       |                       |             |                |                |                |                |                |           |                                                |                                  | _____ ml                                   |  |
| 42 | Carrot                                                                            |                                                                                                       |                       |             |                |                |                |                |                |           |                                                |                                  | _____ ml                                   |  |
| 43 | Pumpkin                                                                           |                                                                                                       |                       |             |                |                |                |                |                |           |                                                |                                  | _____ ml                                   |  |
| 44 | Green peas                                                                        |                                                                                                       |                       |             |                |                |                |                |                |           |                                                |                                  | _____ ml                                   |  |
| 45 | Green beans                                                                       |                                                                                                       |                       |             |                |                |                |                |                |           |                                                |                                  | _____ ml                                   |  |

Comments?

9

|    | Food                                                       | How often have they eaten this food this month?<br><i>Complete one frequency column only per food</i> |                       |             |                |                |                |                |                |           |                                                | How much did they eat each time? |                                            |  |
|----|------------------------------------------------------------|-------------------------------------------------------------------------------------------------------|-----------------------|-------------|----------------|----------------|----------------|----------------|----------------|-----------|------------------------------------------------|----------------------------------|--------------------------------------------|--|
|    |                                                            | Not eaten this month                                                                                  | Less than once a week | Once a week | 2 times a week | 3 times a week | 4 times a week | 5 times a week | 6 times a week | Every day | If more than once a day – how many times a day | Units                            | How many [units] would they eat each time? |  |
| 46 | Sweet corn                                                 |                                                                                                       |                       |             |                |                |                |                |                |           |                                                |                                  | _____ ml                                   |  |
| 47 | Broccoli                                                   |                                                                                                       |                       |             |                |                |                |                |                |           |                                                |                                  | _____ ml                                   |  |
| 48 | Cauliflower                                                |                                                                                                       |                       |             |                |                |                |                |                |           |                                                |                                  | _____ ml                                   |  |
| 49 | Capsicum (peppers)                                         |                                                                                                       |                       |             |                |                |                |                |                |           |                                                |                                  | _____ ml                                   |  |
| 50 | Red cabbage                                                |                                                                                                       |                       |             |                |                |                |                |                |           |                                                |                                  | _____ ml                                   |  |
| 51 | Green cabbage                                              |                                                                                                       |                       |             |                |                |                |                |                |           |                                                |                                  | _____ ml                                   |  |
| 52 | Spinach or silverbeet                                      |                                                                                                       |                       |             |                |                |                |                |                |           |                                                |                                  | _____ ml                                   |  |
| 53 | Lettuce or salad leaves                                    |                                                                                                       |                       |             |                |                |                |                |                |           |                                                |                                  | _____ ml                                   |  |
| 54 | Cucumber                                                   |                                                                                                       |                       |             |                |                |                |                |                |           |                                                |                                  | 1 slice                                    |  |
| 55 | Raw tomato                                                 |                                                                                                       |                       |             |                |                |                |                |                |           |                                                |                                  | 1 tomato                                   |  |
| 56 | Cooked tomato (pasta sauce, canned tomatoes, tomato sauce) |                                                                                                       |                       |             |                |                |                |                |                |           |                                                |                                  | _____ ml                                   |  |
| 57 | Leeks                                                      |                                                                                                       |                       |             |                |                |                |                |                |           |                                                |                                  | _____ ml                                   |  |
| 58 | Other vegetables: _____                                    |                                                                                                       |                       |             |                |                |                |                |                |           |                                                |                                  | _____ ml                                   |  |

Comments?

## E. Meat, chicken, fish, eggs, beans

|    | Food                                      | How often have they eaten this food this month?<br><i>Complete one frequency column only per food</i> |                       |             |                |                |                |                |                |           |                                                | How much did they eat each time? |                                            |  |
|----|-------------------------------------------|-------------------------------------------------------------------------------------------------------|-----------------------|-------------|----------------|----------------|----------------|----------------|----------------|-----------|------------------------------------------------|----------------------------------|--------------------------------------------|--|
|    |                                           | Not eaten this month                                                                                  | Less than once a week | Once a week | 2 times a week | 3 times a week | 4 times a week | 5 times a week | 6 times a week | Every day | If more than once a day – how many times a day | Units                            | How many [units] would they eat each time? |  |
| 59 | Chicken nuggets or shapes                 |                                                                                                       |                       |             |                |                |                |                |                |           |                                                |                                  | 1 nugget                                   |  |
| 60 | Fish fingers or shapes                    |                                                                                                       |                       |             |                |                |                |                |                |           |                                                |                                  | 1 fish finger                              |  |
| 61 | Battered or crumbed fish                  |                                                                                                       |                       |             |                |                |                |                |                |           |                                                |                                  | 1 fillet                                   |  |
| 62 | Other chicken (eg. roast, stir-fry, BBQ)  |                                                                                                       |                       |             |                |                |                |                |                |           |                                                |                                  | 1 drumstick                                |  |
| 63 | Other fish (eg. canned, pan-fried)        |                                                                                                       |                       |             |                |                |                |                |                |           |                                                |                                  | _____ ml                                   |  |
| 64 | Sausages, saveloys (including vegetarian) |                                                                                                       |                       |             |                |                |                |                |                |           |                                                |                                  | 1 sausage                                  |  |
| 65 | Ham, bacon, luncheon, salami              |                                                                                                       |                       |             |                |                |                |                |                |           |                                                |                                  | 1 slice                                    |  |
| 66 | Meat pies                                 |                                                                                                       |                       |             |                |                |                |                |                |           |                                                |                                  | 1 pie                                      |  |
| 67 | Sausage rolls                             |                                                                                                       |                       |             |                |                |                |                |                |           |                                                |                                  | 1 roll                                     |  |
| 68 | Mince & patties (from beef or lamb)       |                                                                                                       |                       |             |                |                |                |                |                |           |                                                |                                  | _____ ml                                   |  |

Comments?

11

|    | Food                                              | How often have they eaten this food this month?<br><i>Complete one frequency column only per food</i> |                       |             |                |                |                |                |                |           |                                                | How much did they eat each time? |                                            |  |
|----|---------------------------------------------------|-------------------------------------------------------------------------------------------------------|-----------------------|-------------|----------------|----------------|----------------|----------------|----------------|-----------|------------------------------------------------|----------------------------------|--------------------------------------------|--|
|    |                                                   | Not eaten this month                                                                                  | Less than once a week | Once a week | 2 times a week | 3 times a week | 4 times a week | 5 times a week | 6 times a week | Every day | If more than once a day – how many times a day | Units                            | How many [units] would they eat each time? |  |
| 69 | Steak, chops or roast (beef or lamb)              |                                                                                                       |                       |             |                |                |                |                |                |           |                                                |                                  | _____ ml                                   |  |
| 70 | Pork and other meat                               |                                                                                                       |                       |             |                |                |                |                |                |           |                                                |                                  | _____ ml                                   |  |
| 71 | Eggs                                              |                                                                                                       |                       |             |                |                |                |                |                |           |                                                |                                  | 1 egg                                      |  |
| 72 | Hummus (chickpea dip)                             |                                                                                                       |                       |             |                |                |                |                |                |           |                                                |                                  | _____ ml                                   |  |
| 73 | Baked beans                                       |                                                                                                       |                       |             |                |                |                |                |                |           |                                                |                                  | 1 medium can (420g)                        |  |
| 74 | Canned or home cooked beans, chickpeas or lentils |                                                                                                       |                       |             |                |                |                |                |                |           |                                                |                                  | _____ ml                                   |  |
| 75 | Nuts (any sort but not peanut butter)             |                                                                                                       |                       |             |                |                |                |                |                |           |                                                |                                  | _____ ml                                   |  |

Comments?

## F. Spreads

|    | Food                | How often have they eaten this food this month?<br><i>Complete one frequency column only per food</i> |                       |             |                |                |                |                |                |           |                                                | How much did they eat each time? |                                            |  |
|----|---------------------|-------------------------------------------------------------------------------------------------------|-----------------------|-------------|----------------|----------------|----------------|----------------|----------------|-----------|------------------------------------------------|----------------------------------|--------------------------------------------|--|
|    |                     | Not eaten this month                                                                                  | Less than once a week | Once a week | 2 times a week | 3 times a week | 4 times a week | 5 times a week | 6 times a week | Every day | If more than once a day – how many times a day | Units                            | How many [units] would they eat each time? |  |
| 76 | Jam or honey        |                                                                                                       |                       |             |                |                |                |                |                |           |                                                |                                  | _____ ml                                   |  |
| 77 | Marmite or Vegemite |                                                                                                       |                       |             |                |                |                |                |                |           |                                                |                                  | _____ ml                                   |  |
| 78 | Peanut butter       |                                                                                                       |                       |             |                |                |                |                |                |           |                                                |                                  | _____ ml                                   |  |
| 79 | Nutella             |                                                                                                       |                       |             |                |                |                |                |                |           |                                                |                                  | _____ ml                                   |  |

Comments?

13

## G. Cakes, biscuits, snacks

|    | Food                                            | How often have they eaten this food this month?<br><i>Complete one frequency column only per food</i> |                       |             |                |                |                |                |                |           |                                                | How much did they eat each time? |                                            |  |
|----|-------------------------------------------------|-------------------------------------------------------------------------------------------------------|-----------------------|-------------|----------------|----------------|----------------|----------------|----------------|-----------|------------------------------------------------|----------------------------------|--------------------------------------------|--|
|    |                                                 | Not eaten this month                                                                                  | Less than once a week | Once a week | 2 times a week | 3 times a week | 4 times a week | 5 times a week | 6 times a week | Every day | If more than once a day – how many times a day | Units                            | How many [units] would they eat each time? |  |
| 80 | Biscuits – chocolate coated                     |                                                                                                       |                       |             |                |                |                |                |                |           |                                                |                                  | 1 biscuit                                  |  |
| 81 | Biscuits – other                                |                                                                                                       |                       |             |                |                |                |                |                |           |                                                |                                  | 1 biscuit                                  |  |
| 82 | Cakes or slices                                 |                                                                                                       |                       |             |                |                |                |                |                |           |                                                |                                  | 1 large raisin box                         |  |
| 83 | Muffins or scones                               |                                                                                                       |                       |             |                |                |                |                |                |           |                                                |                                  | 1 medium muffin                            |  |
| 84 | Croissant, sweet buns, iced buns, pastries      |                                                                                                       |                       |             |                |                |                |                |                |           |                                                |                                  | 1 item                                     |  |
| 85 | Fruit bread, currant buns                       |                                                                                                       |                       |             |                |                |                |                |                |           |                                                |                                  | 1 slice                                    |  |
| 86 | Chocolate                                       |                                                                                                       |                       |             |                |                |                |                |                |           |                                                |                                  | 1 square                                   |  |
| 87 | Lollies                                         |                                                                                                       |                       |             |                |                |                |                |                |           |                                                |                                  | 1 lolly                                    |  |
| 88 | Crisps, corn chips, corn snacks (e.g. Cheezels) |                                                                                                       |                       |             |                |                |                |                |                |           |                                                |                                  | 1 snack packet (18g)                       |  |
| 89 | Muesli, nut, cereal or puffed rice bars         |                                                                                                       |                       |             |                |                |                |                |                |           |                                                |                                  | 1 bar                                      |  |
| 90 | Fruit leather, fruit strings, fruit roll-ups    |                                                                                                       |                       |             |                |                |                |                |                |           |                                                |                                  | _____ ml                                   |  |

Comments?

## H. Milk and dairy products

|    | Food                                                                     | How often have they eaten this food this month?<br><i>Complete one frequency column only per food</i> |                       |             |                |                |                |                |                |           |                                                | How much did they eat each time? |                                            |  |
|----|--------------------------------------------------------------------------|-------------------------------------------------------------------------------------------------------|-----------------------|-------------|----------------|----------------|----------------|----------------|----------------|-----------|------------------------------------------------|----------------------------------|--------------------------------------------|--|
|    |                                                                          | Not eaten this month                                                                                  | Less than once a week | Once a week | 2 times a week | 3 times a week | 4 times a week | 5 times a week | 6 times a week | Every day | If more than once a day – how many times a day | Units                            | How many [units] would they eat each time? |  |
| 91 | Flavoured milk (including Milo, Quick, Drinking chocolate, Up-and-Go)    |                                                                                                       |                       |             |                |                |                |                |                |           |                                                |                                  | _____ ml                                   |  |
| 92 | Low-fat cows milk (green, lite blue, yellow-top) <b>as a drink</b>       |                                                                                                       |                       |             |                |                |                |                |                |           |                                                |                                  | _____ ml                                   |  |
| 93 | Low-fat cows milk <b>on cereal or other food</b> (not custard or sauces) |                                                                                                       |                       |             |                |                |                |                |                |           |                                                |                                  | _____ ml                                   |  |
| 94 | Cows milk (blue, silver-top) <b>as a drink</b>                           |                                                                                                       |                       |             |                |                |                |                |                |           |                                                |                                  | _____ ml                                   |  |
| 95 | Cows milk <b>on cereal or other food</b> (not custard or sauces)         |                                                                                                       |                       |             |                |                |                |                |                |           |                                                |                                  | _____ ml                                   |  |
| 96 | Soy milk <b>as a drink</b>                                               |                                                                                                       |                       |             |                |                |                |                |                |           |                                                |                                  | _____ ml                                   |  |
| 97 | Soy milk <b>on cereal or other food</b> (including custard or sauces)    |                                                                                                       |                       |             |                |                |                |                |                |           |                                                |                                  | _____ ml                                   |  |
| 98 | Other milk (goat, rice) <b>as a drink</b>                                |                                                                                                       |                       |             |                |                |                |                |                |           |                                                |                                  | _____ ml                                   |  |
| 99 | Other milk (goat, rice) <b>on cereal or other food</b>                   |                                                                                                       |                       |             |                |                |                |                |                |           |                                                |                                  | _____ ml                                   |  |

Comments?

15

|     | Food                          | How often have they eaten this food this month?<br><i>Complete one frequency column only per food</i> |                       |             |                |                |                |                |                |           |                                                | How much did they eat each time? |                                            |  |
|-----|-------------------------------|-------------------------------------------------------------------------------------------------------|-----------------------|-------------|----------------|----------------|----------------|----------------|----------------|-----------|------------------------------------------------|----------------------------------|--------------------------------------------|--|
|     |                               | Not eaten this month                                                                                  | Less than once a week | Once a week | 2 times a week | 3 times a week | 4 times a week | 5 times a week | 6 times a week | Every day | If more than once a day – how many times a day | Units                            | How many [units] would they eat each time? |  |
| 100 | Cheese (including in recipes) |                                                                                                       |                       |             |                |                |                |                |                |           |                                                |                                  | _____ ml                                   |  |
| 101 | Yoghurt or dairy food         |                                                                                                       |                       |             |                |                |                |                |                |           |                                                |                                  | _____ ml                                   |  |
| 102 | White sauce or cheese sauce   |                                                                                                       |                       |             |                |                |                |                |                |           |                                                |                                  | _____ ml                                   |  |
| 103 | Butter (not in baking)        |                                                                                                       |                       |             |                |                |                |                |                |           |                                                |                                  | _____ ml                                   |  |
| 104 | Margarine (not in baking)     |                                                                                                       |                       |             |                |                |                |                |                |           |                                                |                                  | _____ ml                                   |  |
| 105 | Cream or sour cream           |                                                                                                       |                       |             |                |                |                |                |                |           |                                                |                                  | _____ ml                                   |  |

Comments?



## I. Puddings

|      |                                 | How often have they eaten this food this month?<br><i>Complete one frequency column only per food</i> |                       |             |                |                |                |                |                |           |                                                | How much did they eat each time? |                                            |
|------|---------------------------------|-------------------------------------------------------------------------------------------------------|-----------------------|-------------|----------------|----------------|----------------|----------------|----------------|-----------|------------------------------------------------|----------------------------------|--------------------------------------------|
| Food |                                 | Not eaten this month                                                                                  | Less than once a week | Once a week | 2 times a week | 3 times a week | 4 times a week | 5 times a week | 6 times a week | Every day | If more than once a day – how many times a day | Units                            | How many [units] would they eat each time? |
| 106  | Ice cream                       |                                                                                                       |                       |             |                |                |                |                |                |           |                                                | _____ ml                         |                                            |
| 107  | Custard and other milk puddings |                                                                                                       |                       |             |                |                |                |                |                |           |                                                | _____ ml                         |                                            |
| 108  | Puddings not yet described      |                                                                                                       |                       |             |                |                |                |                |                |           |                                                | _____ ml                         |                                            |

Comments?

17

## J. Drinks

|      |                                                 | How often have they eaten this food this month?<br><i>Complete one frequency column only per food</i> |                       |             |                |                |                |                |                |           |                                                | How much did they eat each time? |                                            |
|------|-------------------------------------------------|-------------------------------------------------------------------------------------------------------|-----------------------|-------------|----------------|----------------|----------------|----------------|----------------|-----------|------------------------------------------------|----------------------------------|--------------------------------------------|
| Food |                                                 | Not eaten this month                                                                                  | Less than once a week | Once a week | 2 times a week | 3 times a week | 4 times a week | 5 times a week | 6 times a week | Every day | If more than once a day – how many times a day | Units                            | How many [units] would they eat each time? |
| 109  | 100% orange juice (freshly squeezed or similar) |                                                                                                       |                       |             |                |                |                |                |                |           |                                                | _____ ml                         |                                            |
| 110  | Other fruit juice ("Fresh up", "Just Juice")    |                                                                                                       |                       |             |                |                |                |                |                |           |                                                | _____ ml                         |                                            |
| 111  | Fruit drinks, Ribena, cordial, sachets          |                                                                                                       |                       |             |                |                |                |                |                |           |                                                | _____ ml                         |                                            |
| 112  | Regular fizzy drinks (lemonade, coke)           |                                                                                                       |                       |             |                |                |                |                |                |           |                                                | _____ ml                         |                                            |
| 113  | Diet fizzy drinks (lemonade, coke)              |                                                                                                       |                       |             |                |                |                |                |                |           |                                                | _____ ml                         |                                            |
| 114  | Tea (not herbal)                                |                                                                                                       |                       |             |                |                |                |                |                |           |                                                | _____ ml                         |                                            |
| 115  | Coffee                                          |                                                                                                       |                       |             |                |                |                |                |                |           |                                                | _____ ml                         |                                            |

Comments?

## K. Takeaways

|      | Food                                                                                                   | How often have they eaten this food this month?<br><i>Complete one frequency column only per food</i> |                       |             |                |                |                |                |                |           |                                                | How much did they eat each time? |                                            |  |
|------|--------------------------------------------------------------------------------------------------------|-------------------------------------------------------------------------------------------------------|-----------------------|-------------|----------------|----------------|----------------|----------------|----------------|-----------|------------------------------------------------|----------------------------------|--------------------------------------------|--|
|      |                                                                                                        | Not eaten this month                                                                                  | Less than once a week | Once a week | 2 times a week | 3 times a week | 4 times a week | 5 times a week | 6 times a week | Every day | If more than once a day – how many times a day | Units                            | How many [units] would they eat each time? |  |
| 116. | Chips from a takeaway shop or fast food restaurant (KFC, McDonalds, Burger King)                       |                                                                                                       |                       |             |                |                |                |                |                |           |                                                |                                  | _____ ml                                   |  |
| 117  | Hotdog, fish, sausage from a takeaway shop                                                             |                                                                                                       |                       |             |                |                |                |                |                |           |                                                |                                  | 1 item                                     |  |
| 118  | Burgers from a takeaway shop or fast food restaurant (KFC, McDonalds, Burger King)                     |                                                                                                       |                       |             |                |                |                |                |                |           |                                                |                                  | 1 burger                                   |  |
| 119  | Other item from a takeaway shop or fast food restaurant (KFC, McDonalds, Burger King (please describe) |                                                                                                       |                       |             |                |                |                |                |                |           |                                                |                                  | 1 item                                     |  |
| 120  | Ready to eat pizza (takeaway shop or supermarket)                                                      |                                                                                                       |                       |             |                |                |                |                |                |           |                                                |                                  | 1 slice                                    |  |
| 121  | KFC or other fried chicken                                                                             |                                                                                                       |                       |             |                |                |                |                |                |           |                                                |                                  | 1 piece                                    |  |
| 122  | Subway sandwich                                                                                        |                                                                                                       |                       |             |                |                |                |                |                |           |                                                |                                  | 1 6" roll                                  |  |
| 123  | Kebabs or wraps (bought)                                                                               |                                                                                                       |                       |             |                |                |                |                |                |           |                                                |                                  | 1 wrap                                     |  |
| 124  | Sushi (bought)                                                                                         |                                                                                                       |                       |             |                |                |                |                |                |           |                                                |                                  | 1 piece                                    |  |
| 125  | Chinese, Thai, or Indian meal or similar (bought)                                                      |                                                                                                       |                       |             |                |                |                |                |                |           |                                                |                                  | _____ ml                                   |  |

Comments?

19

126 On average over the past 4 weeks, how many meals per week were given to your child by someone other than yourself? \_\_\_\_\_ meals

127 If more than 0 meals, how many of these meals have you been able to include in this questionnaire?

None     Some     Most     All

Thank you for completing this questionnaire

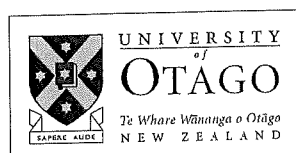

Department of Human Nutrition and  
Department of Medicine  
University of Otago  
P. O. Box 56, Dunedin 9054  
Email:  
Phone:

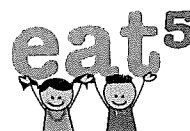

Supplement: nutrients-11-01290-s001.pdf [file nutrients-11-01290-s001.pdf]
